# Supplementary material for: Redox regulation and dynamic control of brain-selective kinases BRSK1/2 in the AMPK family through cysteine-based mechanisms
Source: eLife. 2025 Apr 2;13:RP92536. doi: 10.7554/eLife.92536 (PMC11964447; doi:10.7554/eLife.92536)
Supplement: Supplementary file 1. — Cysteine pairs within 10 Å are considered proximal. [file elife-92536-supp1.xlsx]

## Sheet: Supplemental File 1
Group	Family	Proximal Cysteine Pairs
AGC	CDC42BPG	CYS115-CYS217, CYS217-CYS115
AGC	DMPK	CYS115-CYS217, CYS217-CYS115
AGC	CDC42BPB	CYS120-CYS222, CYS222-CYS120
AGC	CDC42BPA	CYS121-CYS223, CYS223-CYS121
AGC	SGK2	CYS181-CYS195, CYS195-CYS219, CYS195-CYS181, CYS219-CYS195
AGC	RSKR	CYS184-CYS187, CYS187-CYS184
AGC	GRK5	CYS201-CYS214, CYS201-CYS203, CYS201-CYS260, CYS203-CYS201, CYS203-CYS214, CYS203-CYS260, CYS214-CYS201, CYS214-CYS203, CYS214-CYS260, CYS260-CYS201, CYS260-CYS214, CYS260-CYS203
AGC	GRK6	CYS201-CYS260, CYS201-CYS214, CYS201-CYS203, CYS203-CYS201, CYS203-CYS260, CYS203-CYS214, CYS214-CYS201, CYS214-CYS260, CYS214-CYS203, CYS260-CYS201, CYS260-CYS214, CYS260-CYS203
AGC	GRK4	CYS202-CYS215, CYS202-CYS204, CYS202-CYS261, CYS204-CYS202, CYS204-CYS215, CYS204-CYS261, CYS215-CYS202, CYS215-CYS204, CYS215-CYS261, CYS261-CYS202, CYS261-CYS215, CYS261-CYS204
AGC	GRK7	CYS206-CYS265, CYS206-CYS219, CYS219-CYS206, CYS219-CYS265, CYS265-CYS206, CYS265-CYS219
AGC	GRK1	CYS207-CYS218, CYS207-CYS264, CYS218-CYS207, CYS218-CYS264, CYS264-CYS207, CYS264-CYS218
AGC	GRK2	CYS208-CYS221, CYS221-CYS208, CYS251-CYS256, CYS256-CYS251
AGC	GRK3	CYS208-CYS268, CYS208-CYS221, CYS221-CYS268, CYS221-CYS208, CYS251-CYS256, CYS256-CYS251, CYS268-CYS221, CYS268-CYS208
AGC	RPS6KB2	CYS216-CYS230, CYS230-CYS216
AGC	ROCK1	CYS220-CYS259, CYS231-CYS259, CYS259-CYS231, CYS259-CYS220
AGC	STK38L	CYS235-CYS304
AGC	ROCK2	CYS236-CYS275, CYS247-CYS275
AGC	RPS6KB1	CYS240-CYS254, CYS254-CYS240
AGC	SGK1	CYS244-CYS258, CYS258-CYS282, CYS258-CYS244
AGC	PDPK1	CYS260-CYS327
CAMK	STK11	CYS132-CYS134, CYS134-CYS132, CYS151-CYS158, CYS158-CYS151
CAMK	PIM2	CYS142-CYS177, CYS177-CYS142, CYS233-CYS260, CYS233-CYS259, CYS259-CYS233, CYS259-CYS260, CYS259-CYS266, CYS260-CYS233, CYS260-CYS259, CYS266-CYS259
CAMK	BRSK1	CYS147-CYS153, CYS153-CYS147, CYS153-CYS191, CYS191-CYS198, CYS191-CYS153, CYS198-CYS191
CAMK	PIM1	CYS158-CYS161, CYS161-CYS158, CYS237-CYS263, CYS263-CYS237, CYS263-CYS270
CAMK	PIM3	CYS161-CYS164, CYS164-CYS161, CYS240-CYS266, CYS266-CYS273, CYS266-CYS240
CAMK	PHKG1	CYS173-CYS185, CYS185-CYS173
CAMK	PHKG2	CYS176-CYS188, CYS188-CYS176
CAMK	SIK3	CYS179-CYS181, CYS181-CYS179, CYS181-CYS312, CYS258-CYS290
CAMK	AURKC	CYS200-CYS224, CYS224-CYS200
CAMK	CAMK1	CYS201-CYS267
CAMK	CAMK4	CYS202-CYS208, CYS208-CYS202
CAMK	CAMK1G	CYS202-CYS268
CAMK	CAMK1D	CYS204-CYS270
CAMK	TSSK1B	CYS211-CYS245, CYS245-CYS211
CAMK	TSSK2	CYS211-CYS245, CYS245-CYS211
CAMK	SIK2	CYS212-CYS244, CYS244-CYS212
CAMK	SIK1	CYS219-CYS251, CYS251-CYS219
CAMK	AURKB	CYS234-CYS258, CYS258-CYS234
CAMK	MKNK2	CYS251-CYS276, CYS276-CYS251
CAMK	MKNK1	CYS257-CYS282, CYS282-CYS257, CYS305-CYS317, CYS305-CYS320, CYS305-CYS309, CYS309-CYS317, CYS309-CYS305, CYS309-CYS320, CYS317-CYS305, CYS317-CYS320, CYS317-CYS309, CYS320-CYS317, CYS320-CYS305, CYS320-CYS309
CAMK	BRSK2	CYS39-CYS42, CYS42-CYS39, CYS132-CYS138, CYS138-CYS132, CYS138-CYS176, CYS176-CYS138, CYS176-CYS183, CYS183-CYS176
CAMK	MAPKAPK3	CYS61-CYS120, CYS61-CYS70, CYS70-CYS120, CYS70-CYS61, CYS70-CYS99, CYS99-CYS70, CYS120-CYS61, CYS120-CYS70
CAMK	STK17A	CYS62-CYS78, CYS78-CYS62
CAMK	CAMK2A	CYS64-CYS126, CYS126-CYS64
CAMK	CAMK2B	CYS65-CYS127, CYS127-CYS65
CAMK	CAMK2D	CYS65-CYS127, CYS127-CYS65, CYS127-CYS200, CYS200-CYS127
CAMK	PLK4	CYS65-CYS4
CAMK	SNRK	CYS66-CYS130, CYS130-CYS66, CYS210-CYS242, CYS242-CYS210
CAMK	MAPKAPK5	CYS69-CYS139, CYS139-CYS69
CAMK	MELK	CYS70-CYS89, CYS89-CYS70, CYS154-CYS169, CYS168-CYS169, CYS169-CYS154, CYS169-CYS168
CAMK	MAPKAPK2	CYS98-CYS133, CYS133-CYS98, CYS224-CYS244, CYS244-CYS224
CAMK	TSSK3	CYS99-CYS137, CYS125-CYS128, CYS128-CYS125, CYS137-CYS99, CYS205-CYS238, CYS238-CYS205
CK1	VRK2	CYS245-CYS285, CYS285-CYS245, CYS285-CYS286, CYS286-CYS285
CK1	TTBK1	CYS91-CYS172, CYS172-CYS91
CMGC	CDKL2	CYS117-CYS278, CYS190-CYS217, CYS190-CYS267, CYS217-CYS190, CYS267-CYS190, CYS267-CYS278, CYS278-CYS267, CYS278-CYS117
CMGC	CDK10	CYS120-CYS176, CYS142-CYS176, CYS142-CYS330, CYS176-CYS120, CYS176-CYS142
CMGC	DYRK4	CYS121-CYS180, CYS180-CYS121, CYS229-CYS255, CYS255-CYS229, CYS292-CYS380
CMGC	CDK9	CYS13-CYS85, CYS85-CYS13, CYS217-CYS245, CYS245-CYS217
CMGC	CLK4	CYS176-CYS236, CYS236-CYS176
CMGC	GSK3B	CYS178-CYS218, CYS218-CYS245, CYS218-CYS178, CYS245-CYS218, CYS245-CYS317
CMGC	CLK1	CYS178-CYS238, CYS238-CYS178
CMGC	CLK2	CYS180-CYS240, CYS240-CYS180
CMGC	HIPK1	CYS184-CYS265, CYS207-CYS265, CYS257-CYS265, CYS265-CYS207, CYS265-CYS184, CYS265-CYS257
CMGC	CDKL3	CYS189-CYS266, CYS266-CYS189
CMGC	HIPK2	CYS193-CYS274, CYS216-CYS274, CYS266-CYS274, CYS274-CYS216, CYS274-CYS193, CYS274-CYS266
CMGC	ICK	CYS213-CYS241, CYS241-CYS213
CMGC	MAK	CYS213-CYS241, CYS241-CYS213
CMGC	HIPK3	CYS214-CYS272, CYS264-CYS272, CYS272-CYS214, CYS272-CYS264
CMGC	DYRK1B	CYS238-CYS264, CYS264-CYS238
CMGC	GSK3A	CYS241-CYS281, CYS281-CYS308, CYS281-CYS241
CMGC	DYRK1A	CYS286-CYS312, CYS312-CYS286
CMGC	MOK	CYS32-CYS82, CYS82-CYS32
CMGC	CLK3	CYS321-CYS381
CMGC	CDKL4	CYS83-CYS143, CYS117-CYS122, CYS117-CYS277, CYS122-CYS117, CYS143-CYS83, CYS189-CYS266, CYS266-CYS277, CYS266-CYS189, CYS277-CYS117, CYS277-CYS266
CMGC	CDK6	CYS83-CYS7, CYS207-CYS280, CYS280-CYS207
CMGC	CDKL1	CYS84-CYS144, CYS118-CYS279, CYS118-CYS123, CYS123-CYS118, CYS144-CYS84, CYS191-CYS268, CYS268-CYS279, CYS268-CYS191, CYS279-CYS118, CYS279-CYS268
CMGC	SRPK3	CYS96-CYS161, CYS129-CYS206, CYS161-CYS96, CYS206-CYS129
CMGC	SRPK2	CYS98-CYS163, CYS131-CYS208, CYS163-CYS98, CYS208-CYS131
NEK	NEK7	CYS146-CYS274, CYS224-CYS274, CYS224-CYS253, CYS253-CYS224
NEK	NEK1	CYS163-CYS175, CYS175-CYS191, CYS175-CYS163, CYS191-CYS175
NEK	NEK5	CYS164-CYS176, CYS176-CYS164, CYS176-CYS217, CYS176-CYS192, CYS192-CYS176, CYS217-CYS176
NEK	NEK8	CYS168-CYS191, CYS191-CYS168
NEK	NEK4	CYS194-CYS195, CYS195-CYS194
NEK	NEK9	CYS223-CYS260, CYS223-CYS239, CYS239-CYS223, CYS239-CYS288, CYS260-CYS223
NEK	NEK11	CYS226-CYS227, CYS227-CYS226
NEK	NEK6	CYS40-CYS64, CYS64-CYS40, CYS157-CYS285, CYS235-CYS285, CYS235-CYS264, CYS264-CYS287, CYS264-CYS235
OTHER	GAK	CYS126-CYS190, CYS145-CYS257, CYS190-CYS126, CYS257-CYS145
OTHER	AAK1	CYS129-CYS193, CYS156-CYS319, CYS156-CYS159, CYS159-CYS319, CYS159-CYS156, CYS193-CYS129
OTHER	PKDCC	CYS132-CYS218, CYS178-CYS188, CYS188-CYS178, CYS218-CYS132
OTHER	BMP2K	CYS133-CYS197, CYS160-CYS323, CYS160-CYS163, CYS163-CYS323, CYS163-CYS160, CYS197-CYS133
OTHER	SBK1	CYS154-CYS187, CYS187-CYS154
OTHER	SBK2	CYS163-CYS196, CYS192-CYS196, CYS196-CYS192, CYS196-CYS163
OTHER	PINK1	CYS166-CYS387, CYS323-CYS330, CYS330-CYS323, CYS387-CYS388, CYS387-CYS166, CYS388-CYS387
OTHER	PKMYT1	CYS169-CYS170, CYS169-CYS247, CYS170-CYS169, CYS170-CYS247, CYS190-CYS247, CYS247-CYS170, CYS247-CYS169, CYS247-CYS190
OTHER	STK16	CYS174-CYS210, CYS210-CYS174
OTHER	WNK3	CYS176-CYS222, CYS222-CYS176, CYS254-CYS337, CYS254-CYS385, CYS254-CYS278
OTHER	STK35	CYS235-CYS267, CYS235-CYS309, CYS267-CYS235, CYS309-CYS235
OTHER	EIF2AK1	CYS267-CYS494
OTHER	WEE2	CYS292-CYS348
OTHER	CDC7	CYS345-CYS363, CYS345-CYS351, CYS345-CYS353, CYS345-CYS360, CYS351-CYS363, CYS351-CYS345, CYS351-CYS353, CYS351-CYS360, CYS353-CYS363, CYS353-CYS351, CYS353-CYS345, CYS353-CYS360, CYS360-CYS363, CYS360-CYS351, CYS360-CYS345, CYS360-CYS353, CYS363-CYS351, CYS363-CYS345, CYS363-CYS353, CYS363-CYS360
OTHER	PDIK1L	CYS41-CYS73, CYS73-CYS41
OTHER	UHMK1	CYS42-CYS43, CYS43-CYS42, CYS130-CYS138, CYS138-CYS130
OTHER	IKBKB	CYS46-CYS59, CYS59-CYS46, CYS114-CYS115, CYS115-CYS114
OTHER	CHUK	CYS46-CYS59, CYS59-CYS46, CYS77-CYS98, CYS98-CYS77, CYS113-CYS114, CYS114-CYS113
OTHER	TBK1	CYS89-CYS91, CYS91-CYS89
OTHER	SBK3	CYS89-CYS93, CYS93-CYS89, CYS123-CYS176, CYS176-CYS123, CYS234-CYS239, CYS239-CYS234
STE	TNIK	CYS134-CYS269, CYS269-CYS134
STE	MINK1	CYS134-CYS269, CYS269-CYS134
STE	SLK	CYS136-CYS272
STE	NRK	CYS158-CYS293, CYS293-CYS158
STE	MAP2K4	CYS174-CYS177, CYS177-CYS174
STE	MYO3A	CYS199-CYS211, CYS211-CYS199
STE	MAP2K7	CYS202-CYS260, CYS260-CYS202
STE	MYO3B	CYS205-CYS217, CYS217-CYS205
STE	TAOK3	CYS211-CYS257, CYS257-CYS211
STE	TAOK2	CYS215-CYS261, CYS261-CYS215
STE	TAOK1	CYS215-CYS261, CYS261-CYS215
STE	MAP4K4	CYS219-CYS269, CYS269-CYS219
TKL	MAP3K11	CYS109-CYS183, CYS109-CYS190, CYS183-CYS109, CYS183-CYS190, CYS190-CYS109, CYS190-CYS183
TKL	MAP3K10	CYS164-CYS171, CYS171-CYS164
TKL	MAP3K12	CYS180-CYS187, CYS180-CYS185, CYS185-CYS180, CYS185-CYS187, CYS187-CYS180, CYS187-CYS185
TKL	MAP3K21	CYS190-CYS197, CYS197-CYS190
TKL	IRAK1	CYS199-CYS278, CYS199-CYS285, CYS203-CYS278, CYS278-CYS203, CYS278-CYS285, CYS278-CYS199, CYS285-CYS278, CYS285-CYS199, CYS302-CYS307, CYS307-CYS302
TKL	MAP3K9	CYS210-CYS217, CYS217-CYS210
TKL	MAP3K13	CYS223-CYS228, CYS223-CYS230, CYS228-CYS230, CYS228-CYS223, CYS230-CYS228, CYS230-CYS223
TKL	TESK1	CYS248-CYS293, CYS248-CYS282, CYS248-CYS294
TKL	RIPK3	CYS265-CYS279, CYS279-CYS265
TKL	ACVR2B	CYS288-CYS400
TKL	ACVR2A	CYS290-CYS401
TKL	BMPR2	CYS302-CYS420
TKL	MAP3K7	CYS51-CYS101, CYS96-CYS101, CYS101-CYS51, CYS101-CYS96, CYS134-CYS137, CYS137-CYS134, CYS180-CYS210, CYS210-CYS180
TKL	ANKK1	CYS52-CYS55, CYS52-CYS90, CYS55-CYS52, CYS90-CYS52, CYS267-CYS277, CYS277-CYS267
TKL	RIPK4	CYS52-CYS88, CYS88-CYS52, CYS248-CYS255, CYS255-CYS248
TKL	TESK2	CYS61-CYS120, CYS120-CYS61, CYS247-CYS280, CYS247-CYS291, CYS247-CYS292
TYR	AATK	CYS188-CYS192, CYS192-CYS188, CYS235-CYS399, CYS235-CYS239, CYS239-CYS235
TYR	LMTK3	CYS196-CYS200, CYS200-CYS196
TYR	TNK1	CYS223-CYS387, CYS223-CYS386, CYS223-CYS348
